# Supplementary material for: The double-edged effects of annealing MgO underlayers on the efficient synthesis of single-wall carbon nanotube forests
Source: Royal Society of Chemistry journal article supplement (doi:10.1039/c7nr06478k), 2017-01-01
Supplement: c7nr06478k1.pdf [file c7nr06478k1.pdf]

Electronic Supplementary Information (ESI) for

**The double-edged effects of annealing MgO underlayers on the efficient synthesis of single-wall carbon nanotube forest**

Takashi Tsuji, Kenji Hata, Don N. Futaba\*, Shunsuke Sakurai\*

CNT-Application Research Centre, National Institute of Advanced Industrial Science and Technology, Central 5, 1-1-1 Higashi, Tsukuba, Ibaraki, 305-8565, Japan

\*Corresponding author: [d-futaba@aist.go.jp](mailto:d-futaba@aist.go.jp), [shunsuke-sakurai@aist.go.jp](mailto:shunsuke-sakurai@aist.go.jp)

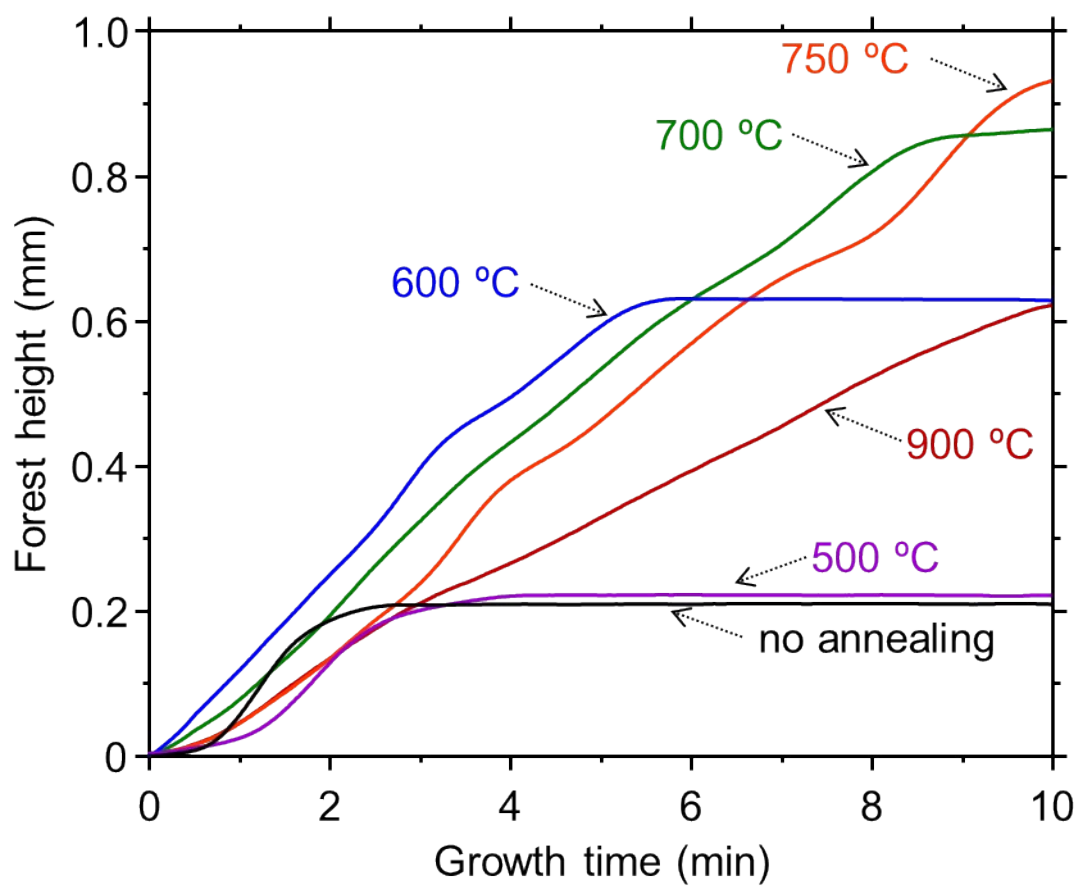

**Figure S1.** Growth evolution curves of CNT forests grown on the MgO underlayers pre-annealed at various temperatures measured by an in-situ telecentric height monitoring system.

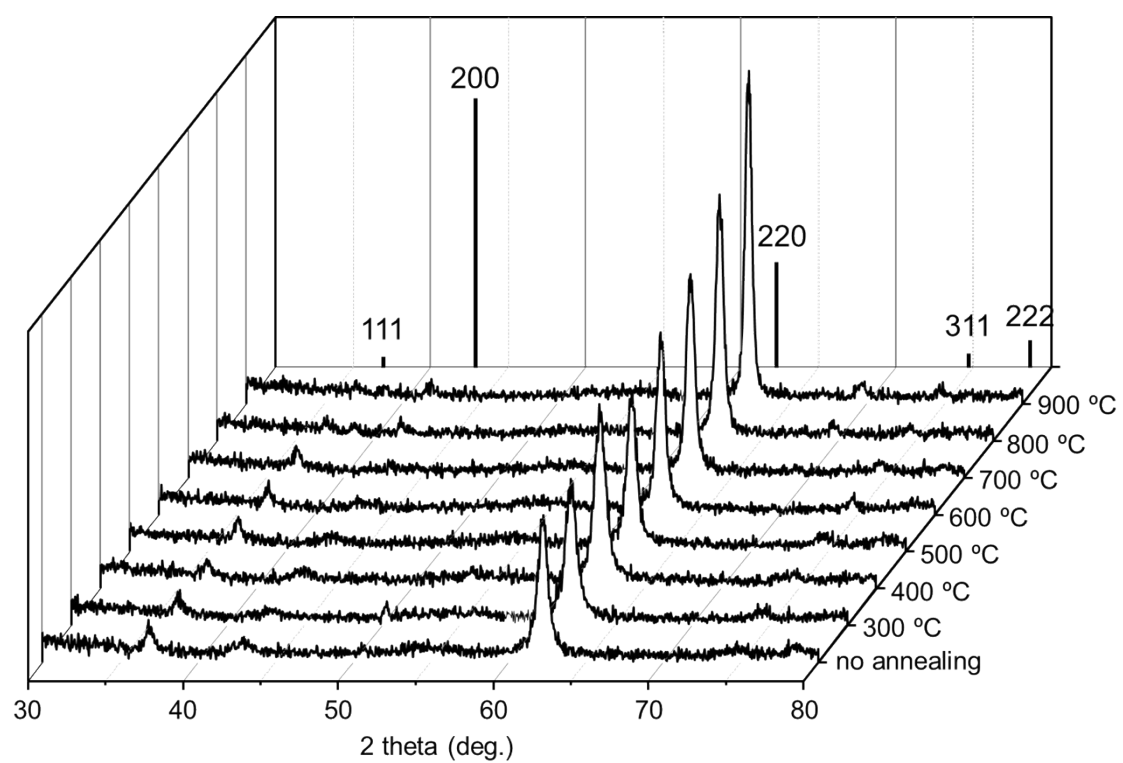

**Figure S2.** X-ray diffraction spectra of the MgO underlayers with different annealing temperatures. The vertical bars correspond to standard data for MgO (PDF card No. 45-0946).
